# Supplementary material
Source: HighWire-hosted journal article supplement (https://bmjpaedsopen.bmj.com/content/3/1/e000365)
Supplement: inline-supplementary-material-1 [file inline-supplementary-material-1.pdf]

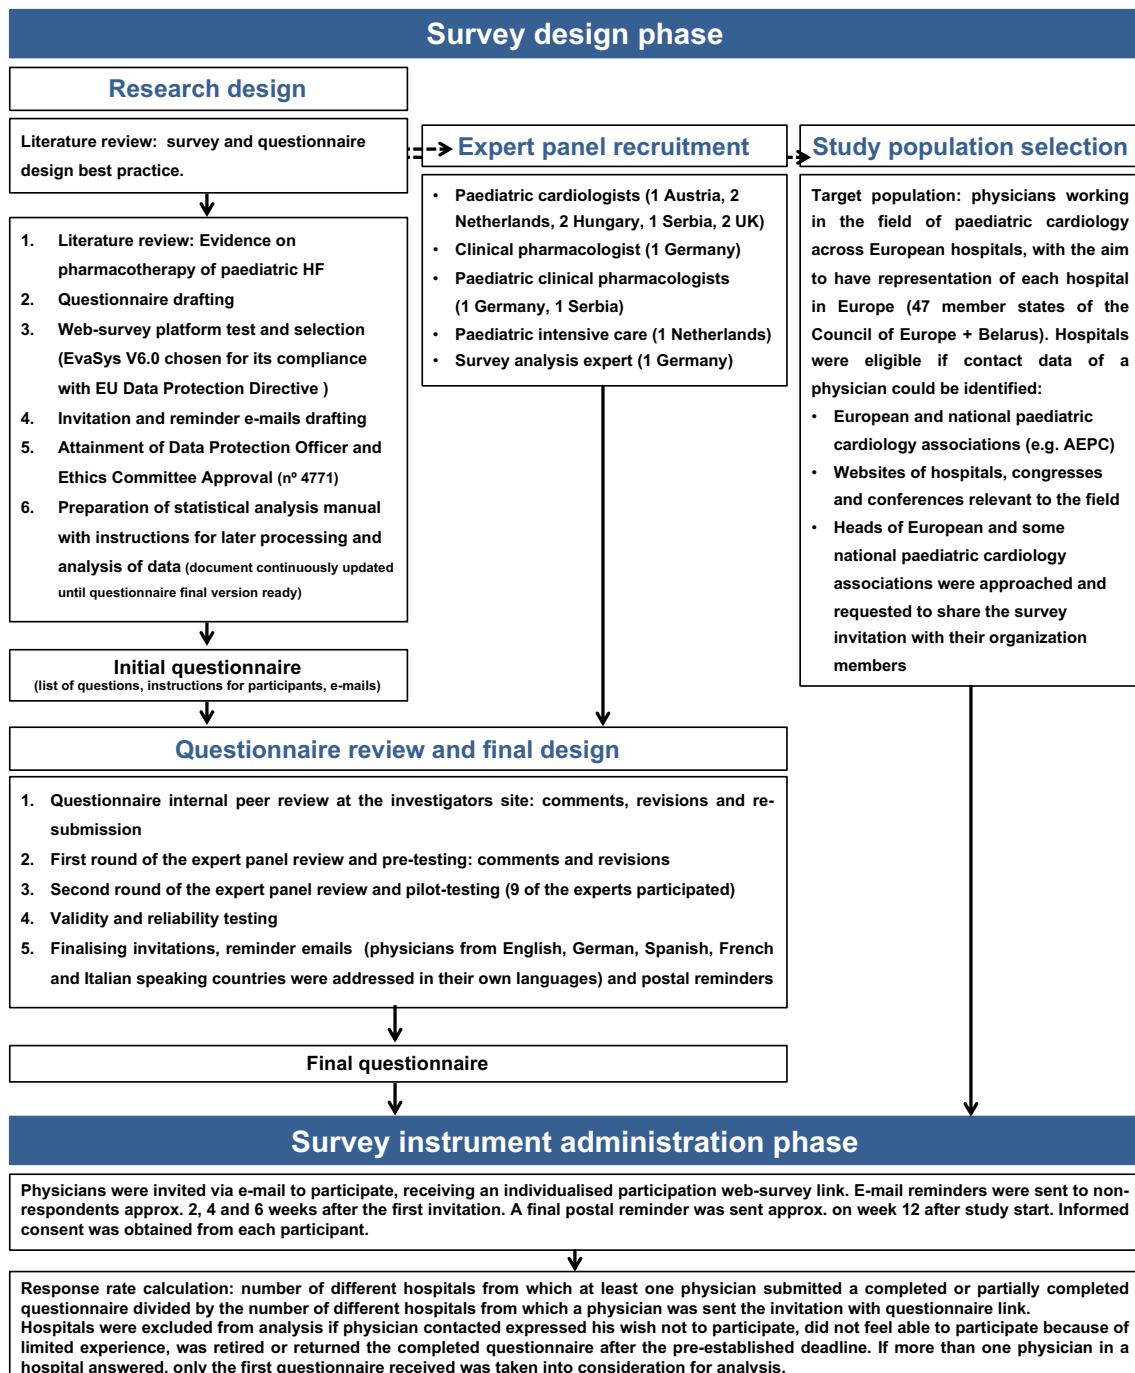

**Figure S1.** Survey study and survey instrument design and administration

This figure is an adaptation of that published by Vogt and Læer [ Vogt W, Læer S. Prevention for pediatric low cardiac output syndrome: results from the European survey EuLoCOS-Paed. *Paediatr Anaesth* 2011;21:1176–84. doi:10.1111/j.1460-9592.2011.03683.x]
