# Supplementary material
Source: HighWire-hosted journal article supplement (https://bmjpaedsopen.bmj.com/content/3/1/e000365)
Supplement: inline-supplementary-material-4 [file inline-supplementary-material-4.pdf]

According to your experience, how would you grade the impact of pharmacological therapy on the course of the disease in your paediatric heart failure patients?

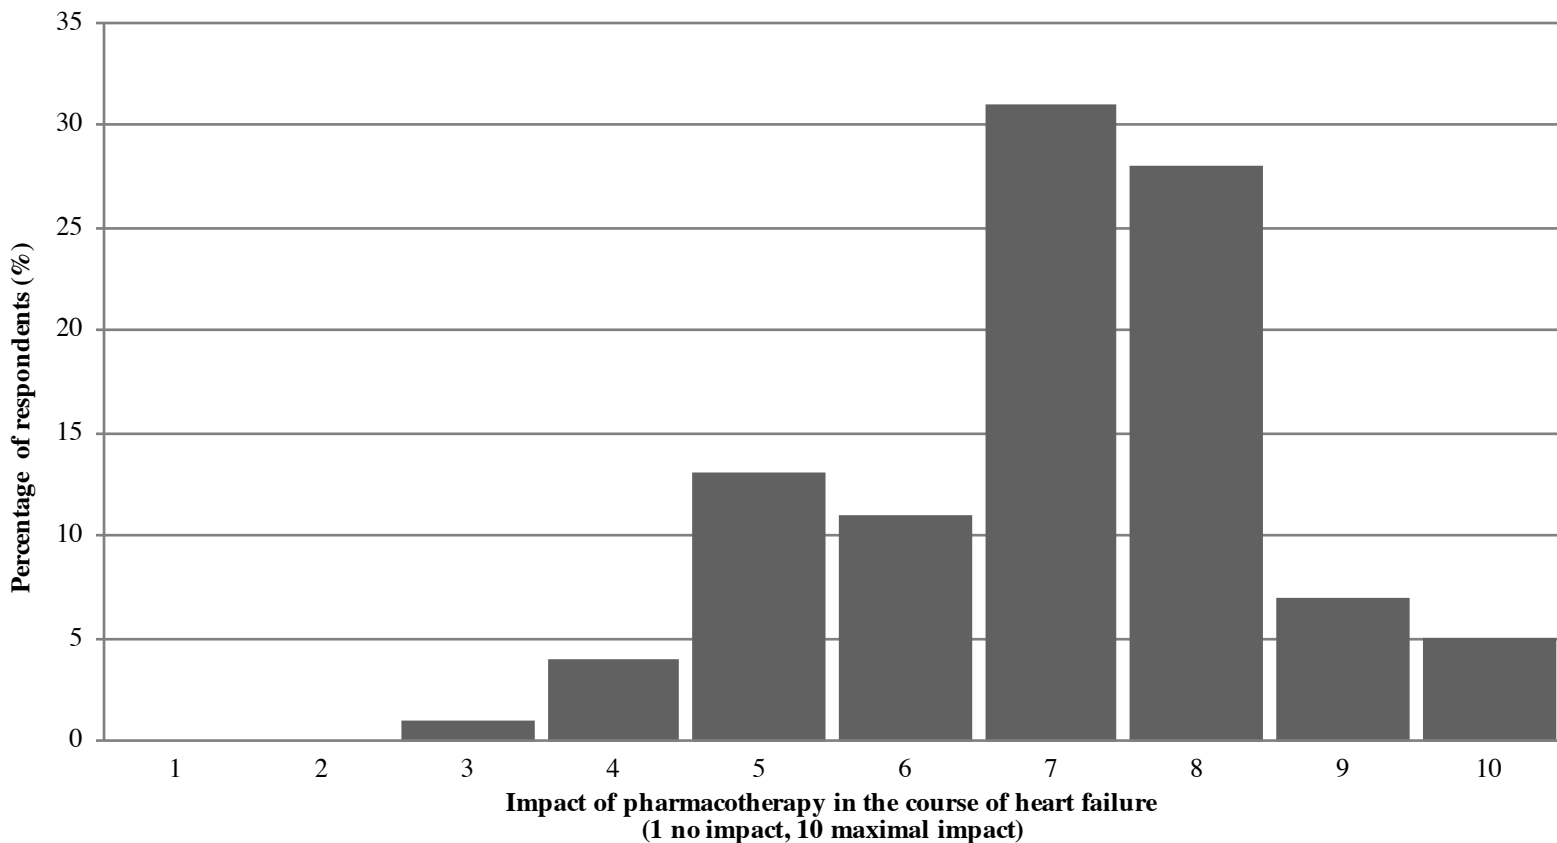

**Figure S3.** Physicians' perception on the impact of pharmacological therapy on the course of the disease in paediatric heart failure patients.
